# Supplementary material for: Missed acute myocardial infarction in the emergency department-standardizing measurement of misdiagnosis-related harms using the SPADE method
Source: publisher site journal article supplement (doi:10.1515/dx-2020-0049), 2020-07-24
Supplement: Supplementary file 1 [file j_dx-2020-0049_suppl.docx]

**Appendix A:** ICD-9-CM, and ICD-10-CM codes used for acute myocardial infarction (AMI).

AMI ICD-9-CM Codes: 410.00, 410.0, 1410.01, 410.02, 410.10, 410.11, 410.11, 410.11, 410.11, 410.12, 410.20, 410.21, 410.21, 410.22, 410.30, 410.31, 410.31, 410.32, 410.40, 410.41, 410.41, 410.42, 410.50, 410.51, 410.51, 410.52, 410.60, 410.61, 410.61, 410.62, 410.70, 410.71, 410.71, 410.72, 410.80, 410.81, 410.81, 410.81, 410.82, 410.90, 410.91, 410.91, 410.92

AMI ICD-10-CM Codes: I21, I22
